# Supplementary material for: Hypoxic ADSCs-derived EVs&nbsp;Promote the Proliferation and Chondrogenic Differentiation of Cartilage Stem/progenitor Cells
Source: Research Square preprint supplement (doi:10.21203/rs.3.rs-127318/v1), 2020-12-16
Supplement: Supplementary file 1 [file a73353b03b5ea6b6b1bb0a90.docx]

Table 1

mRNA         Sequence (5'->3')           Product length

COL2A1       CTGTGTCTGTGACACGGGGA                 385

              TTGGGCAGCAAAGTTTCCAC

Aggrecan      TACCTTGGAGGTCGTGGTGA                 212

TGTGGATGGGGTACCTGACA

SOX9        TGAATCTCCTGGACCCCTTCAT                211

             ACGGGGAACTTGTCCTCTTC

RUNX2      GACACTGCCACCTCTGACTT                   213

GGACATACCGAGGGACATGC

COL10A1    CCAGGCCTGAAGGGACAAAT                   187

GCCCGATCTCACCTTTAGGG

MMP13      ACAAACCACACTTGGGAGGG                    171

CTGCATCTTGAATGGCCGTG

GAPDH      AGACACGATGGTGAAGGTCG                    164

           TGCCGTGGGTGGAATCATAC
